# Supplementary material for: Pericyte loss influences Alzheimer-like neurodegeneration in mice
Source: PubMed Central journal article supplement — Nat Commun. 2013 Dec 13;4:2932. doi: 10.1038/ncomms3932 (PMC3945879; doi:10.1038/ncomms3932), 2013-12-13

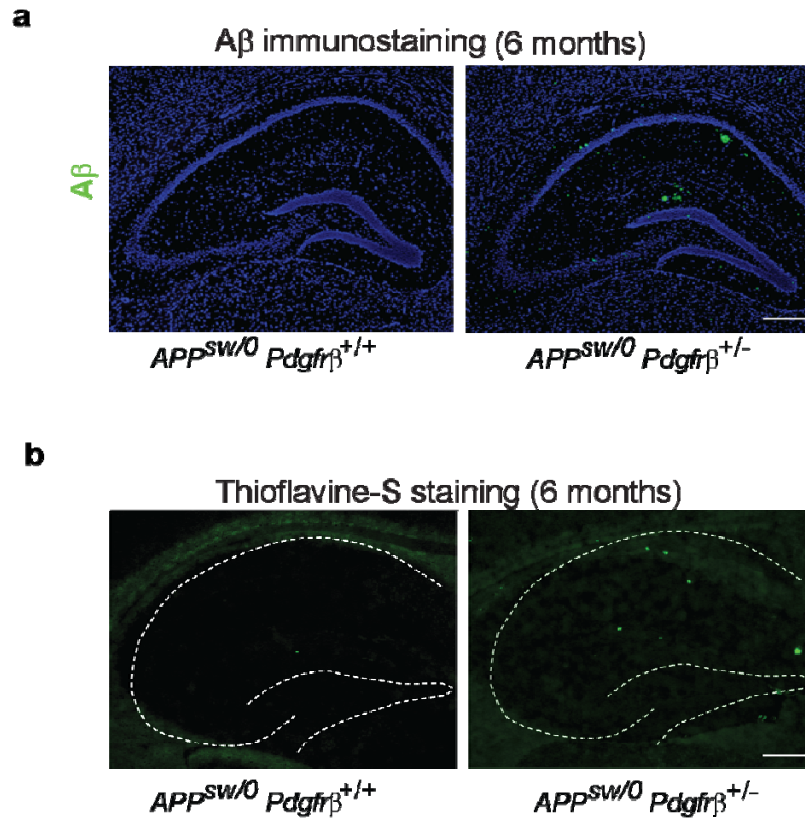

**Supplementary Figure S1. A $\beta$  pathology in pericyte-deficient *APP<sup>sw/0</sup> Pdgfr $\beta$ <sup>+/-</sup>* mice. a-b, Representative cortex and hippocampus sections stained for A $\beta$  (a) and thioflavin S (b) in 6-month old *APP<sup>sw/0</sup>; Pdgfr $\beta$ <sup>+/+</sup>* and *APP<sup>sw/0</sup>; Pdgfr $\beta$ <sup>+/-</sup>* mice. Images are representative findings from 6 mice per group. Scale bar, 100  $\mu$ m.**

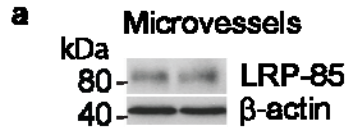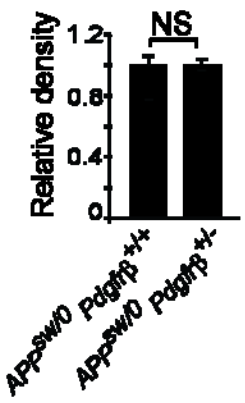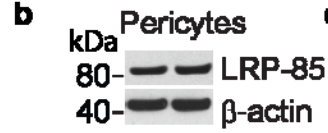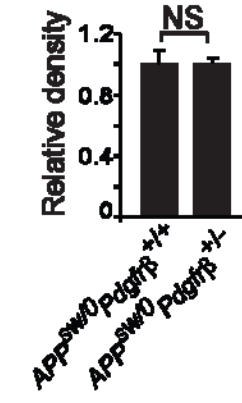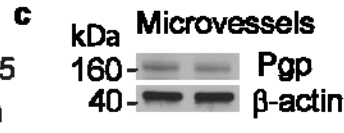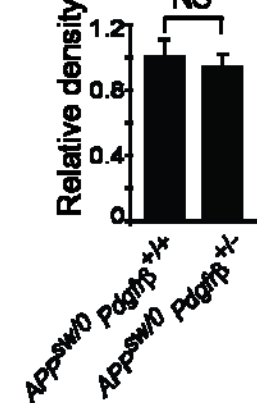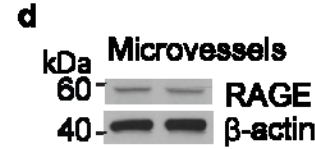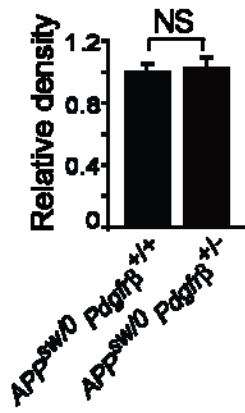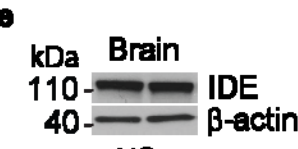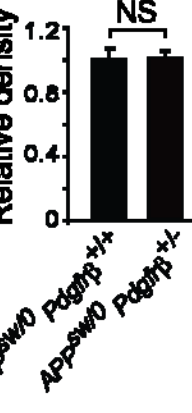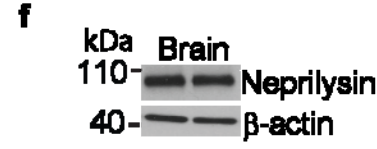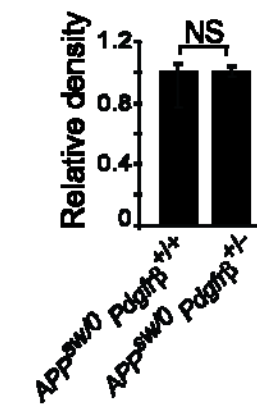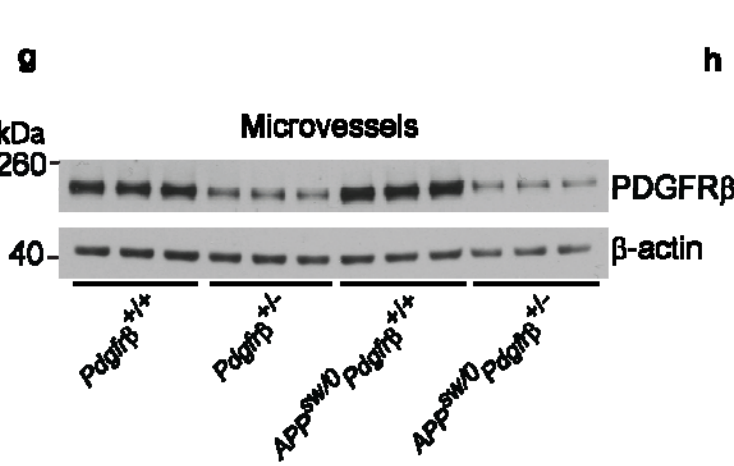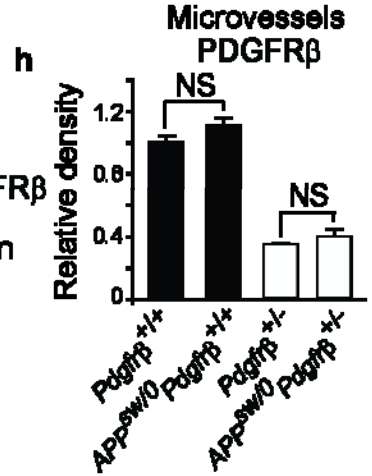

**Supplementary Figure S2. Expression of different A $\beta$  clearance receptors and enzymes and PDGFR $\beta$  in pericyte-deficient  $APP^{sw/0}Pdgfr\beta^{+/-}$  mice.** **a-b**, Relative abundance of LRP1 compared to  $\beta$ -actin determined by immunoblotting of brain microvessels (**a**) and isolated pericytes (**b**) from 9 month old  $APP^{sw/0}Pdgfr\beta^{+/+}$  and  $APP^{sw/0}; Pdgfr\beta^{+/-}$  littermates. **c-d**, Relative abundance of P-glycoprotein (Pgp) (**c**) and receptor for advanced end glycation end products (RAGE) (**d**) compared to  $\beta$ -actin determined by immunoblotting of brain microvessels from 9 month old  $APP^{sw/0}Pdgfr\beta^{+/+}$  and  $APP^{sw/0}; Pdgfr\beta^{+/-}$  littermates. **e-f**, Relative abundance of insulin-degrading enzyme (IDE) (**d**) and neprilysin (NEP) (**e**) compared to  $\beta$ -actin determined by immunoblotting in forebrain homogenates from 9 month old  $APP^{sw/0}; Pdgfr\beta^{+/+}$  and  $APP^{sw/0}; Pdgfr\beta^{+/-}$  littermates. In **a-f**, mean  $\pm$  s.e.m., n=4 mice per group. NS, non-significant by Student's t-test. **g-h**, Relative abundance of PDGFR $\beta$  compared to  $\beta$ -actin in brain microvessels derived from 9 month old  $Pdgfr\beta^{+/+}$ ,  $Pdgfr\beta^{+/-}$ ,  $APP^{sw/0}; Pdgfr\beta^{+/+}$  and  $APP^{sw/0}; Pdgfr\beta^{+/-}$  littermates. In **h**, mean  $\pm$  s.e.m., n=3 mice per group. NS, non-significant by ANOVA followed by Tukey's posthoc tests.

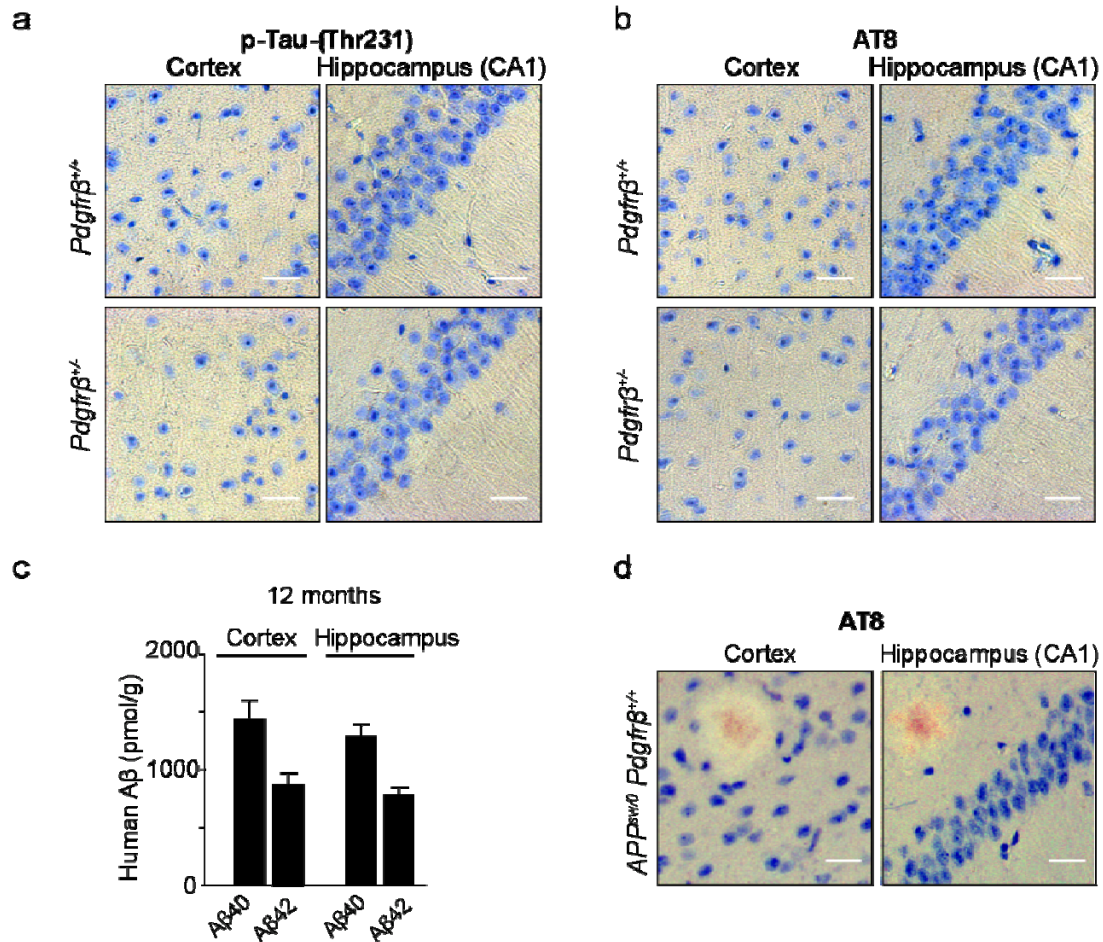

**Supplementary Figure S3. Absence of p-tau in *Pdgfrβ*<sup>+/-</sup> mice and *APP*<sup>sw/0</sup> *Pdgfrβ*<sup>+/+</sup> mice.** **a-b**, Representative cortex and hippocampus sections stained with antibodies against p-tau (Thr231) (**a**) and p-tau (Ser202/Thr205, AT8) (**b**) from 9 month old *Pdgfrβ*<sup>+/+</sup> and *Pdgfrβ*<sup>+/-</sup> mice. Scale bar, 25 μm. **c**, Human Aβ40 and Aβ42 levels in the cortex and hippocampus in 12 month old *APP*<sup>sw/0</sup>; *Pdgfrβ*<sup>+/-</sup> mice. Mean ± s.e.m., n=6 mice per group. **d**, Representative cortex and hippocampus sections stained against p-tau (Ser202/Thr205, AT8) in 12 month old *APP*<sup>sw/0</sup>; *Pdgfrβ*<sup>+/+</sup> mouse. Scale bar, 25 μm. In **a**, **b** and **d**, images are representative findings from 6 mice per group.

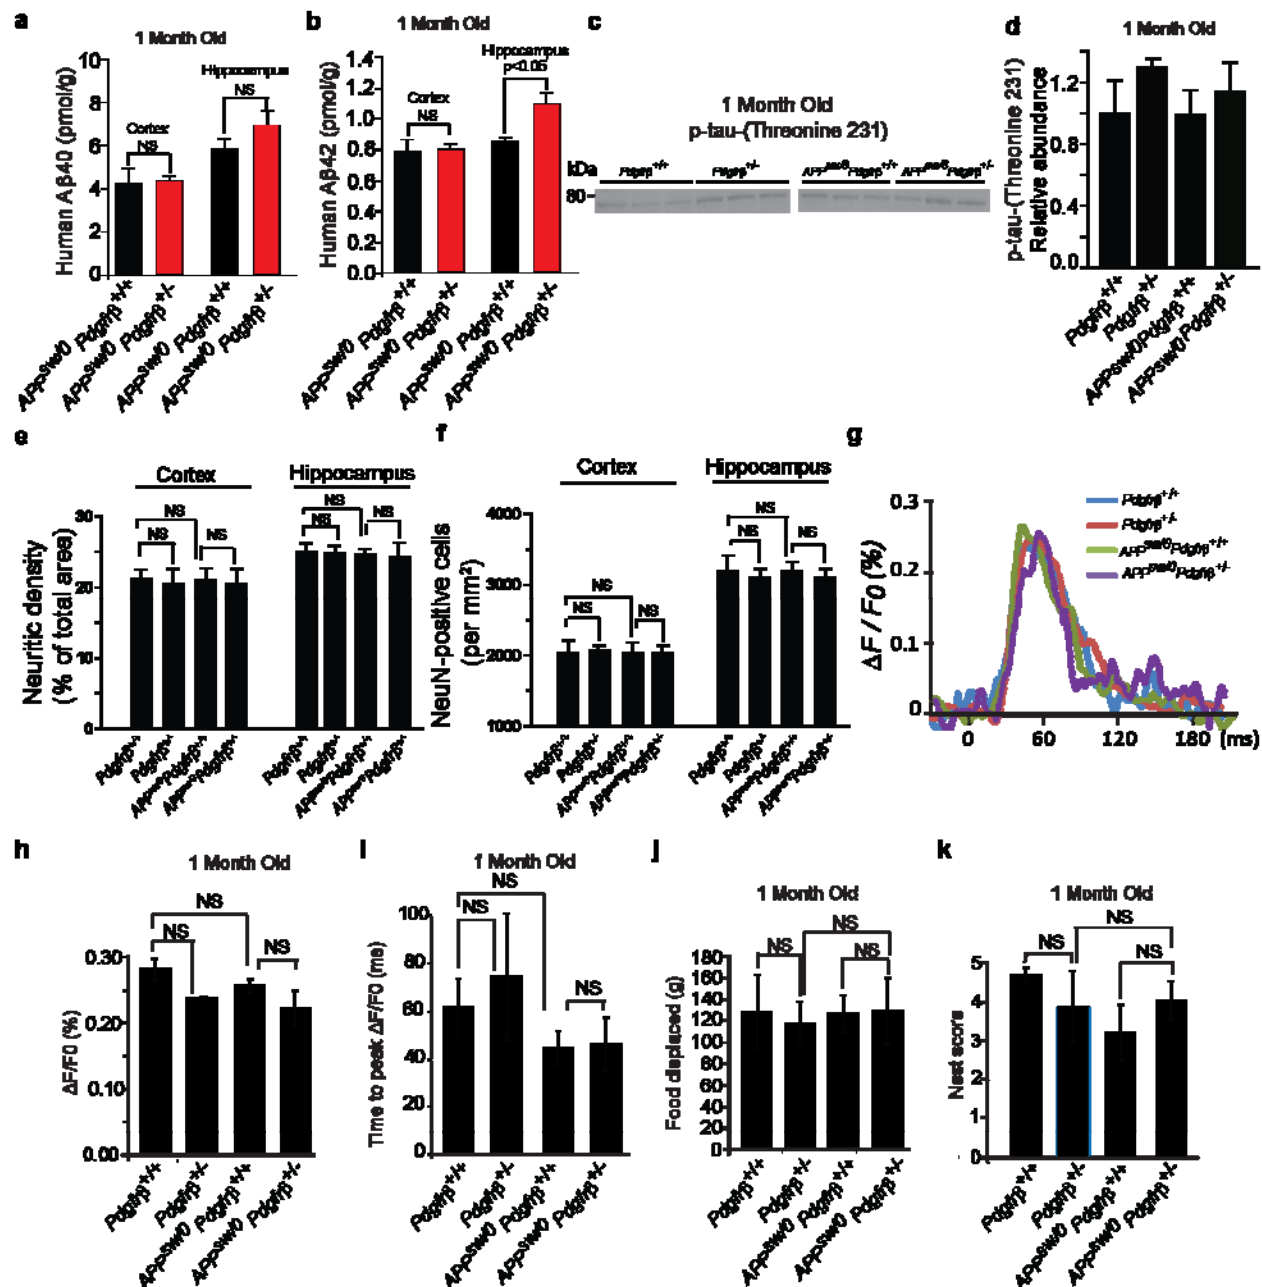

**Supplementary Figure S4. Absence of structural and molecular pathology in young pericyte-deficient *APP $^{sw/0}$*  mice.** **a-b**, Human A $\beta$ 40 and A $\beta$ 42 levels in the cortex and hippocampus of 1 month old *APP $^{sw/0}$ ; Pdgfr $\beta^{+/+}$*  and *APP $^{sw/0}$ ; Pdgfr $\beta^{+/-}$*  mice. **c-d**, p-tau (Thr231) western blot in forebrain homogenates (**c**) and quantification of p-tau levels relative to total tau (**d**) in 1-2 month old *Pdgfr $\beta^{+/+}$* , *Pdgfr $\beta^{+/-}$* , *APP $^{sw/0}$ ; Pdgfr $\beta^{+/+}$*  and *APP $^{sw/0}$ ; Pdgfr $\beta^{+/-}$*  mice. **e-f**, Quantification of SMI311-positive neurofilaments (**e**) and NeuN-positive neurons (**f**) in the cortex of 9 month old *Pdgfr $\beta^{+/+}$* , *Pdgfr $\beta^{+/-}$* , *APP $^{sw/0}$ ; Pdgfr $\beta^{+/+}$*  and *APP $^{sw/0}$ ; Pdgfr $\beta^{+/-}$*  mice. **g-i**, Representative time-lapse-imaging profile analysis of VSD signal response (**g**), peak amplitude (**h**) and time-to-peak (**i**) in fluorescent VSD signal in the hind-limb somatosensory cortex after stimulation in 1-2 month old *Pdgfr $\beta^{+/+}$* , *Pdgfr $\beta^{+/-}$* , *APP $^{sw/0}$ ; Pdgfr $\beta^{+/+}$*  and *APP $^{sw/0}$ ; Pdgfr $\beta^{+/-}$*  mice.

**j-l**, Burrowing (**j**), nest construction (**k**) and novel object location (**l**) in 1-2 month old *Pdgfr $\beta$ <sup>+/+</sup>*, *Pdgfr $\beta$ <sup>+/-</sup>*, *APP<sup>sw/0</sup>*; *Pdgfr $\beta$ <sup>+/+</sup>* and *APP<sup>sw/0</sup>*; *Pdgfr $\beta$ <sup>+/-</sup>* mice. In **a**, **b**, **e**, **f**, **h** and **i**, and in **j** and **k**, mean  $\pm$  s.e.m., n=5 mice per group. In **d**, mean  $\pm$  s.e.m., n=3 mice per group. NS, non-significant by ANOVA followed by Tukey's posthoc tests.

Supplementary Figure S5. Full scans of western blots.

Figure 4f APP

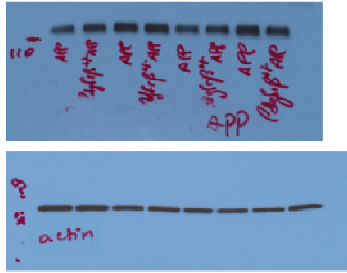

Figure 9a IgG

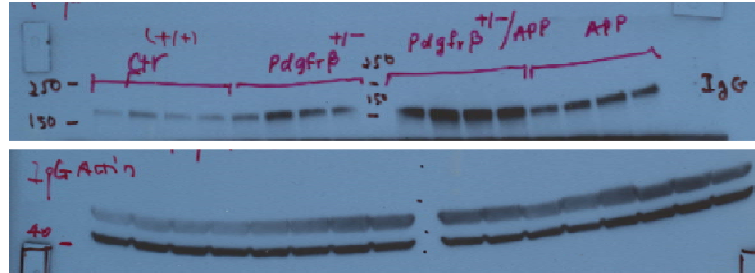

Supplementary Figure S.2a LRP-85

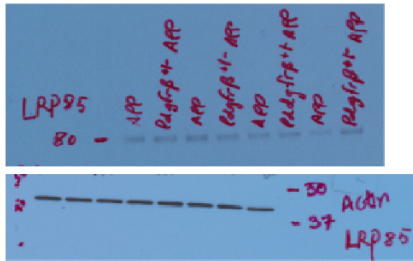

Supplementary Figure S.2b LRP85

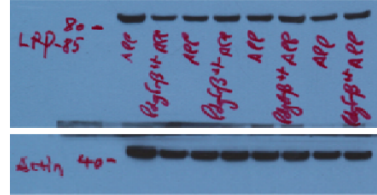

Supplementary Figure S.2c Pgp

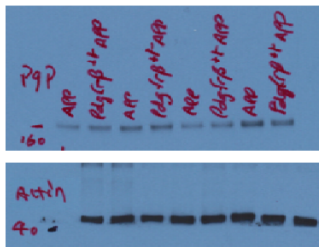

Supplementary Figure S.2d RAGE

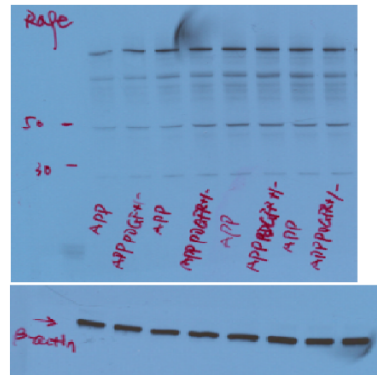

Supplementary Figure S.2e IDE

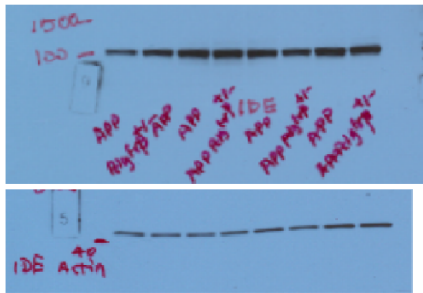

Supplementary Figure S.2f Nephrylin

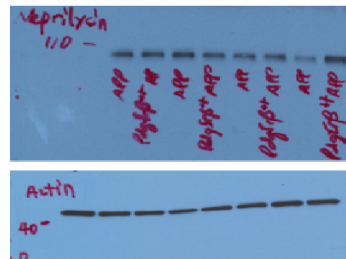

Supplementary Figure S.2g PDGFRβ

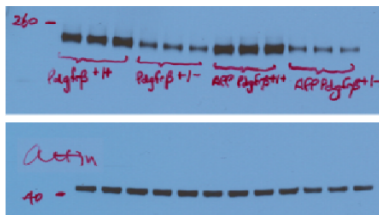

Supplementary Figure S.4c p-tau

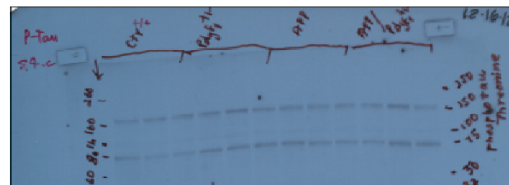

Supplement: ncomms3932-s1.pdf [file ncomms3932-s1.pdf]
